# Supplementary material for: Mace‐Like Plasmonic Au‐Pd Heterostructures Boost Near‐Infrared Photoimmunotherapy
Source: PubMed Central journal article supplement (PMC9951300; doi:10.1002/advs.202204842), 2023-01-04
Supplement: ADVS-10-2204842-s001.pdf [file ADVS-10-2204842-s001.pdf]

## Supporting Information

for *Adv. Sci.*, DOI 10.1002/adv.202204842

Mace-Like Plasmonic Au-Pd Heterostructures Boost Near-Infrared Photoimmunotherapy

*Yanlin Feng, Xin Ning, Jianlin Wang, Zhaoyang Wen, Fangfang Cao\*, Qing You, Jianhua Zou, Xin Zhou, Teng Sun, Jimin Cao\* and Xiaoyuan Chen\**

## Supporting Information

**Mace-like Plasmonic Au-Pd Heterostructures Boost Near-Infrared****Photoimmunotherapy**

*Yanlin Feng<sup>1#</sup>, Xin Ning<sup>1#</sup>, Jianlin Wang<sup>1</sup>, Zhaoyang Wen<sup>1</sup>, Fangfang Cao<sup>2,4,\*</sup>, Qing You<sup>2,4</sup>, Jianhua Zou<sup>2,4</sup>, Xin Zhou<sup>1</sup>, Teng Sun<sup>1</sup>, Jimin Cao<sup>1\*</sup>, Xiaoyuan Chen<sup>2,3,4,\*</sup>*

<sup>1</sup>Key Laboratory of Cellular Physiology at Shanxi Medical University, Ministry of Education, and the Department of Physiology, Shanxi Medical University, Taiyuan 030001, China

<sup>2</sup>Departments of Diagnostic Radiology, Surgery, Chemical and Biomolecular Engineering, and Biomedical Engineering, Yong Loo Lin School of Medicine and Faculty of Engineering, National University of Singapore, Singapore, 119074, Singapore

<sup>3</sup>Clinical Imaging Research Centre, Centre for Translational Medicine, Yong Loo Lin School of Medicine, National University of Singapore, Singapore 117599, Singapore

<sup>4</sup>Nanomedicine Translational Research Program, NUS Center for Nanomedicine, Yong Loo Lin School of Medicine, National University of Singapore, Singapore 117597, Singapore

<sup>5</sup>Institute of Molecular and Cell Biology, Agency for Science, Technology, and Research (A\*STAR), 61 Biopolis Drive, Proteos, Singapore, 138673, Singapore

# These authors contributed equally to this work.

\* Corresponding Authors.

Email: cffdc@nus.edu.sg, caojimin@sxmu.edu.cn, chen.shawn@nus.edu.sg

## Materials

Cetyltrimethylammonium bromide (CTAB, 99%), cetyltrimethylammonium chloride (CTAC, 99%), sodium tetrachloropalladium (NaPdCl<sub>4</sub>), sodium oleate (NaOL), cetylpyridine chloride (CPC), sodium borohydride (NaBH<sub>4</sub>) and ascorbic acid (AA) were purchased from Aladdin. Gold chloride trihydrate (HAuCl<sub>4</sub>·3H<sub>2</sub>O, 99%) was obtained from ACMEC. Hydrochloric acid (HCl, 37 wt%), silver nitrate (AgNO<sub>3</sub>, 99.8%), sodium hydroxide (NaOH, 98.2%) and sodium chloride (NaCl) were supplied by Beijing Chemical Reagent Company (China). Thiol-terminated PEG (PEG-SH, Mw = 5000) was purchased from Ponsure (Shanghai, China). Roswell Park Memorial Institute (RPMI) 1640 medium, the trypsin-EDTA, fetal bovine serum (FBS) and phosphate buffer (PBS) were all acquired from Procell. Cell Counting Kit-8 (CCK-8) was purchased from APEX-BIO. Lipopolysaccharide (LPS), DCFH-DA, APF, SOSG, JC-1, MitoSox Red, murine GM-CSF and murine IL-4 were acquired from Sigma. Superoxide anion Content Detection Kit was purchased from Solarbio. Celcein-AM, PI, Annexin V-FITC Apoptosis Detection Kit and One Step TUNEL Apoptosis Assay Kit were obtained from Beyotime.  $\alpha$ -PD-L1 was acquired from Bio X Cell. Immune globulin G (IgG), tumor necrosis factor  $\alpha$  (TNF- $\alpha$ ) and interferon  $\gamma$  (IFN- $\gamma$ ) were purchased from BD Biosciences. Anti-CD16/32, anti-CD11c FITC, anti-CD86 PE, anti-CD80 APC, FITC antimouse CD3 antibody, PE antimouse CD4 antibody, APC antimouse CD8 antibody, 7-AAD viability staining solution, FITC antimouse Rat IgG2a  $\kappa$  isotype ctrl antibody, PE/Cy7 antimouse Rat IgG2a  $\lambda$  isotype ctrl antibody, PE antimouse Rat IgG2a  $\kappa$  isotype ctrl antibody, FITC antimouse Rat IgG2b  $\kappa$  isotype ctrl antibody, PE antimouse Rat IgG2b  $\kappa$  isotype ctrl antibody and APC antimouse Rat IgG1  $\kappa$  isotype ctrl antibody were acquired from Biolegend. PBFI-AM was purchased from Abcam (Cambridge, United Kingdom). Pluronic F-127 was acquired from Solarbio. All of these chemicals were used without further purification. Distilled water for laboratory was obtained from the Milli-Q System.

## Characterization

The morphology was characterized by Transmission electron microscopy (TEM) and STEM-high angle annular dark field (HAADF) (FEI Tecnai G20). X-ray diffraction (XRD) pattern was recorded by Rigaku-Dmax 2500 diffractometer. UV-Vis spectra were recorded with UH5700 UV-Vis/visible/NIR spectrometer. Zeta potential and dynamic light scattering (DLS) were measured by Malvern Nanosizer ZS.

## Cell culture

Mouse breast cancer (4T1) cells and mouse embryonic fibroblast (NIH-3T3) cells were purchased from Shanghai Institute of Biological Sciences and cultured in a 25 cm<sup>2</sup> cell culture

dish using complete medium (RPMI-1640). The cell lines were placed in an incubator at 37 °C containing 5% CO<sub>2</sub>. Cells are passed by trypsin digestion.

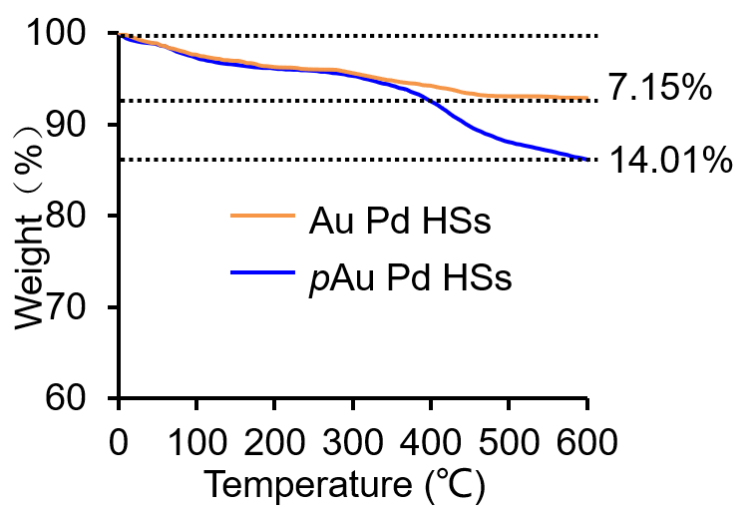

**Figure S1.** Thermogravimetric analysis of Au Pd HSs and pAu Pd HSs.

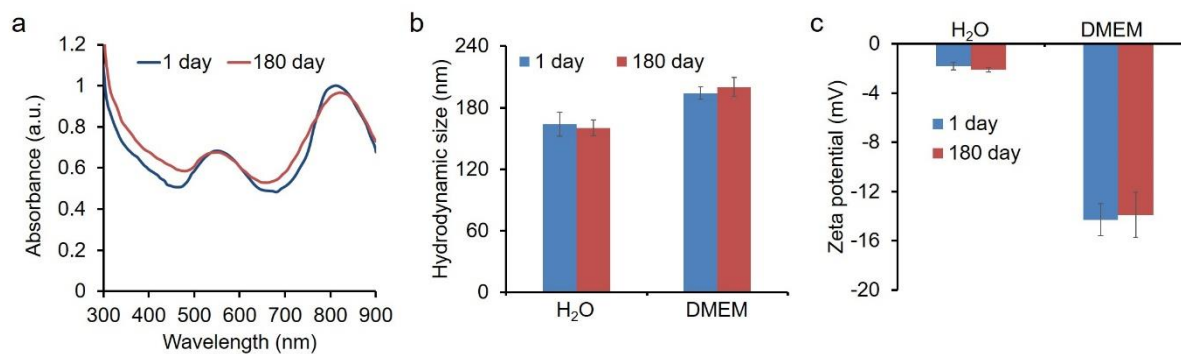

**Figure S2.** The storage stability of *pAu Pd HSs* for 6 month (180 days). (a) the absorption profile of *pAu Pd HSs* in DMEM medium after 1 day and 180 days storage, (b) The hydrodynamic size, and (c) zeta potential of *pAu Pd HSs* in H<sub>2</sub>O and DMEM medium after 1 day and 180 days storage.

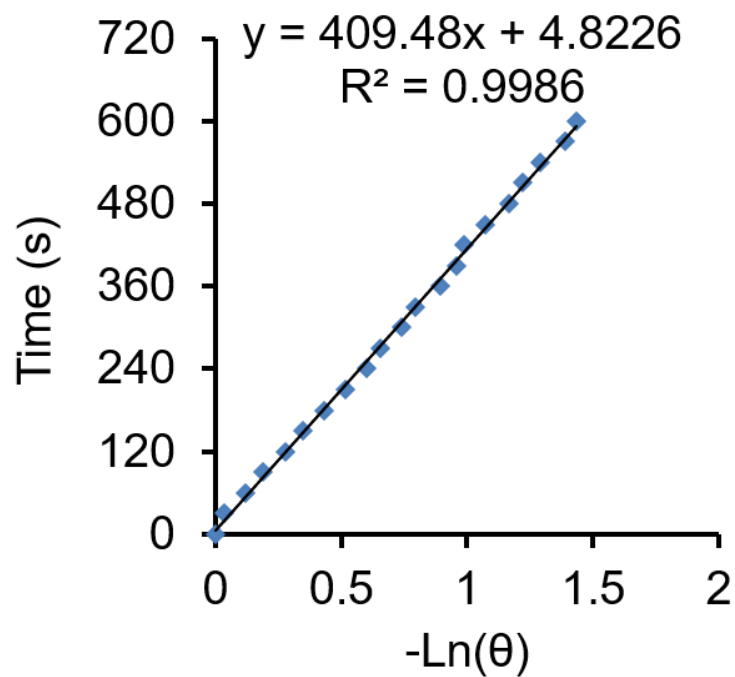

**Figure S3.** Plot and linear fit of time versus negative natural logarithm of the temperature elevation for the cooling rate of *p*Au Pd HSs.

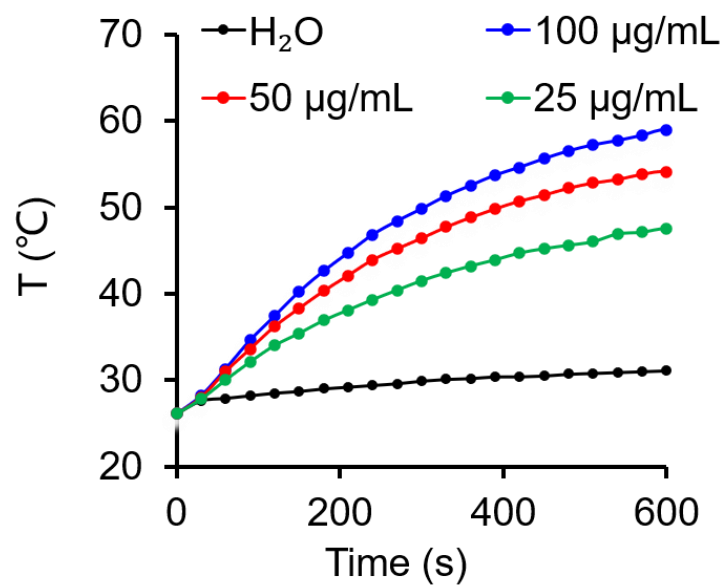

**Figure S4.** Temperature elevation of various concentrations of *p*Au Pd HSs with 808 nm laser irradiation ( $0.75 \text{ W/cm}^2$ ).



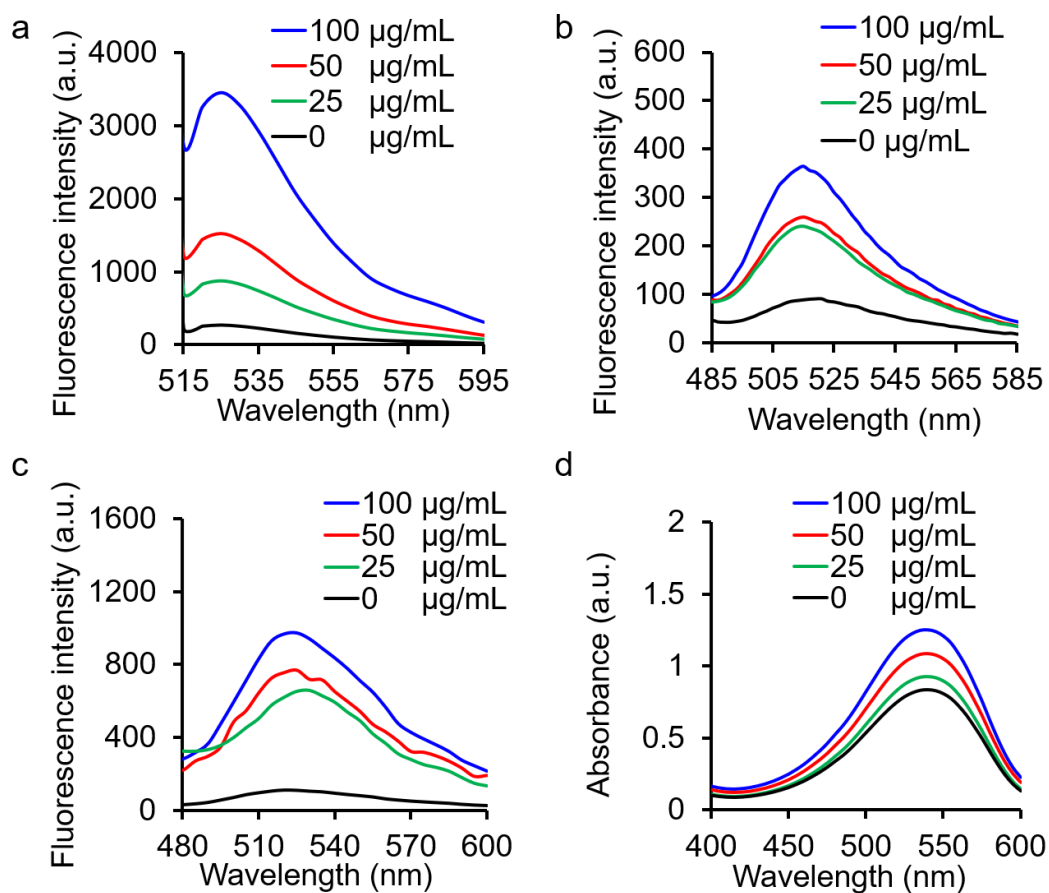

**Figure S5.** Total ROS,  $\cdot\text{OH}$ ,  $^1\text{O}_2$  and  $\text{O}_2\cdot^-$  assessments on pAu Pd HSs of various concentrations with 808 nm laser irradiation ( $0.5 \text{ W/cm}^2$ , 10 min) by DCF (a), APF (b), SOSG (c) and superoxide anion assay (d), respectively. PBS was used as control.

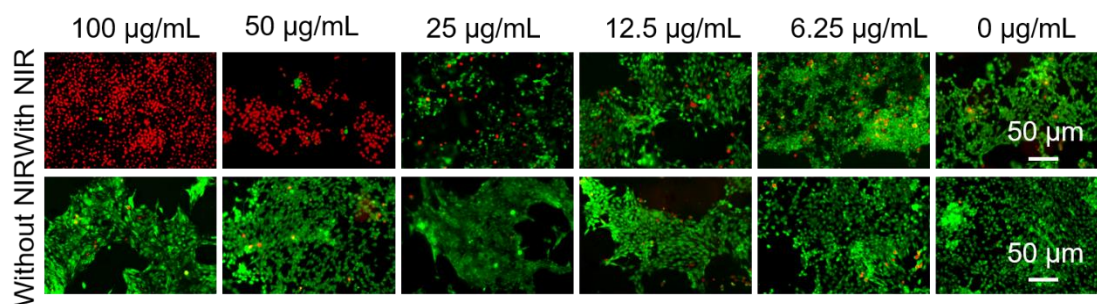

**Figure S6.** Live/dead staining of 4T1 cells treated with 0-100 µg/mL pAu Pd HSs for 24 h with or without 808 nm laser irradiation ( $0.5 \text{ W/cm}^2$ , 10 min).

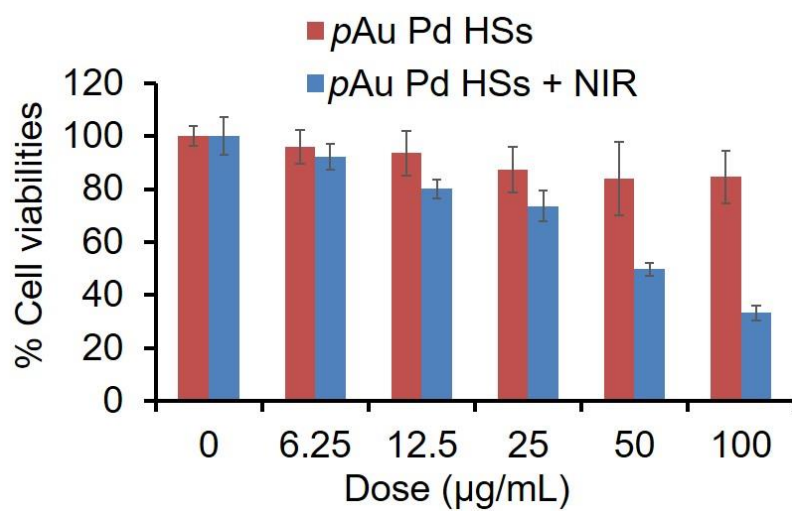

**Figure S7.** CCK-8-based cell viability assessment of NIH-3T3 cells after treatment of pAu Pd HSs at various concentrations without or with 808 nm laser irradiation.

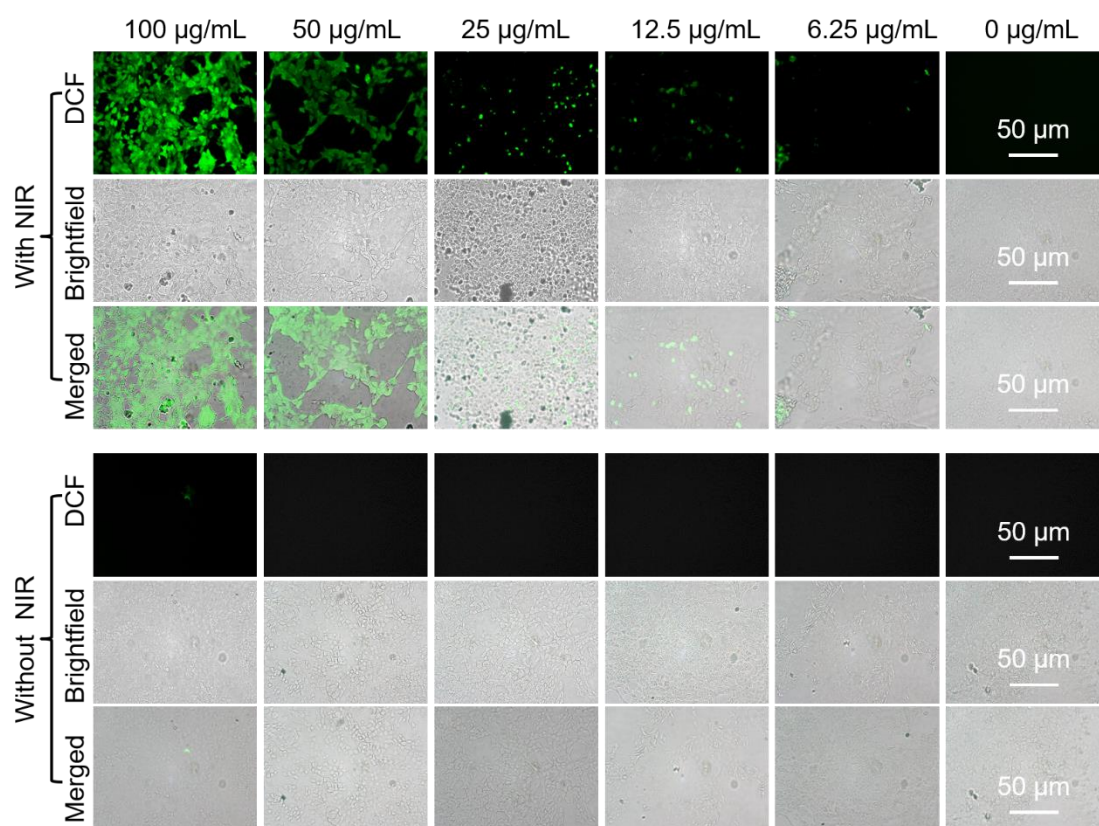

**Figure S8.** Fluorescence microscopy images of 4T1 cells to detect intracellular ROS (DCF, green). Cell nuclei (blue) were stained with DAPI.

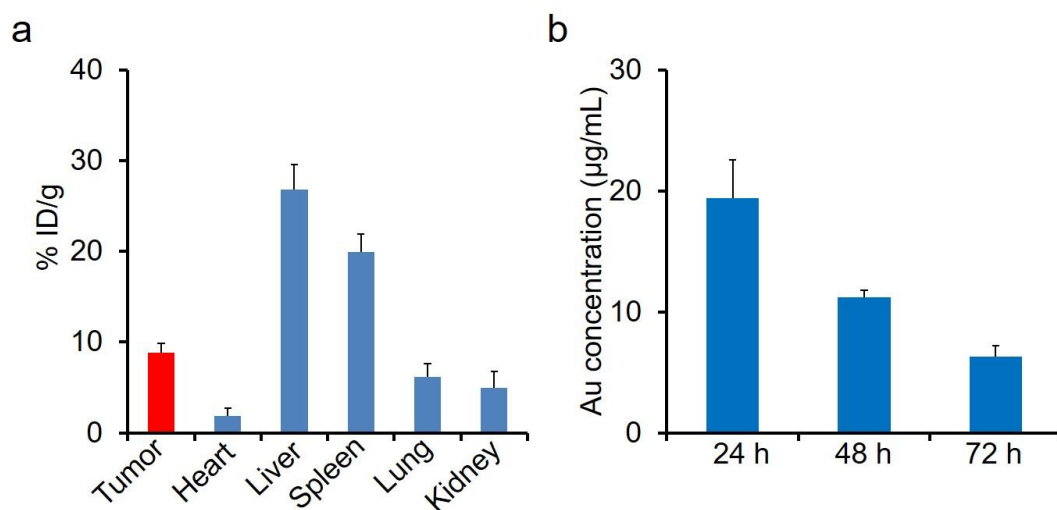

**Figure S9.** (a) Biodistribution of *pAu Pd HSs* in mice. (data expressed as Au percentage of the injected dose per gram of tissue (% ID/g)). (b) Au concentration in urine samples obtained at 24, 48 and 72 h after intravenously (i.v.) injection.

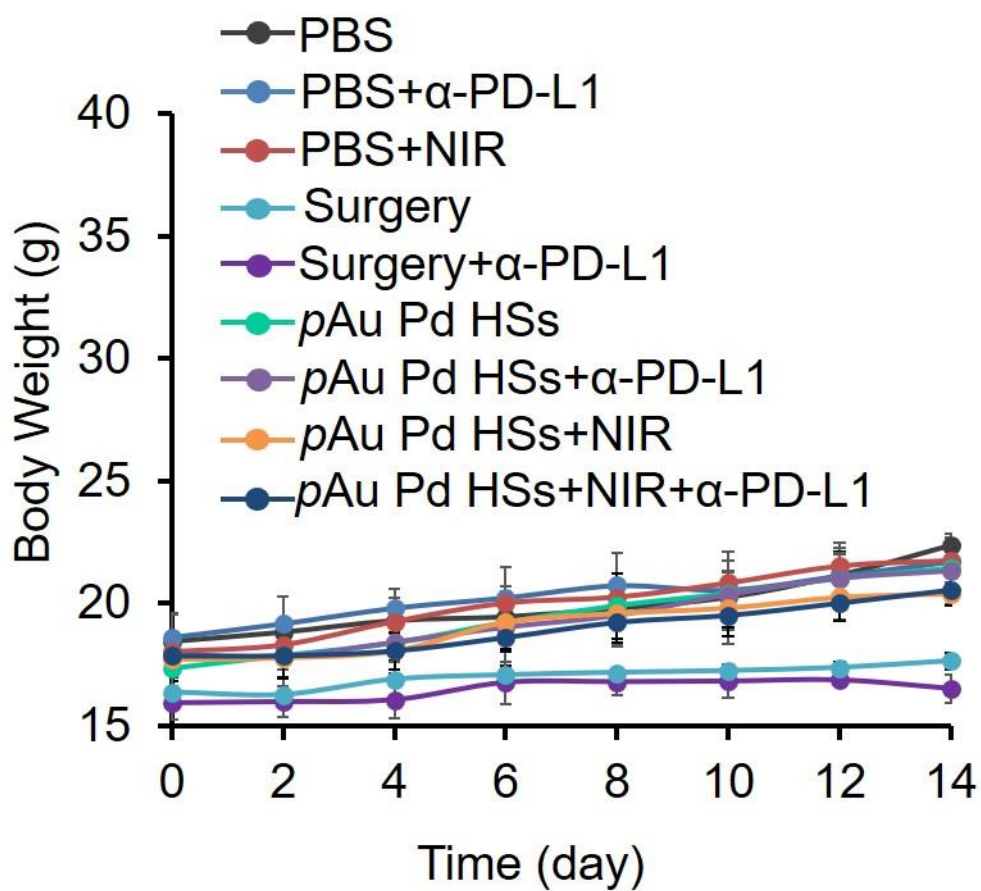

**Figure S10.** Body weight of mice from different groups for 14 days after various treatments.



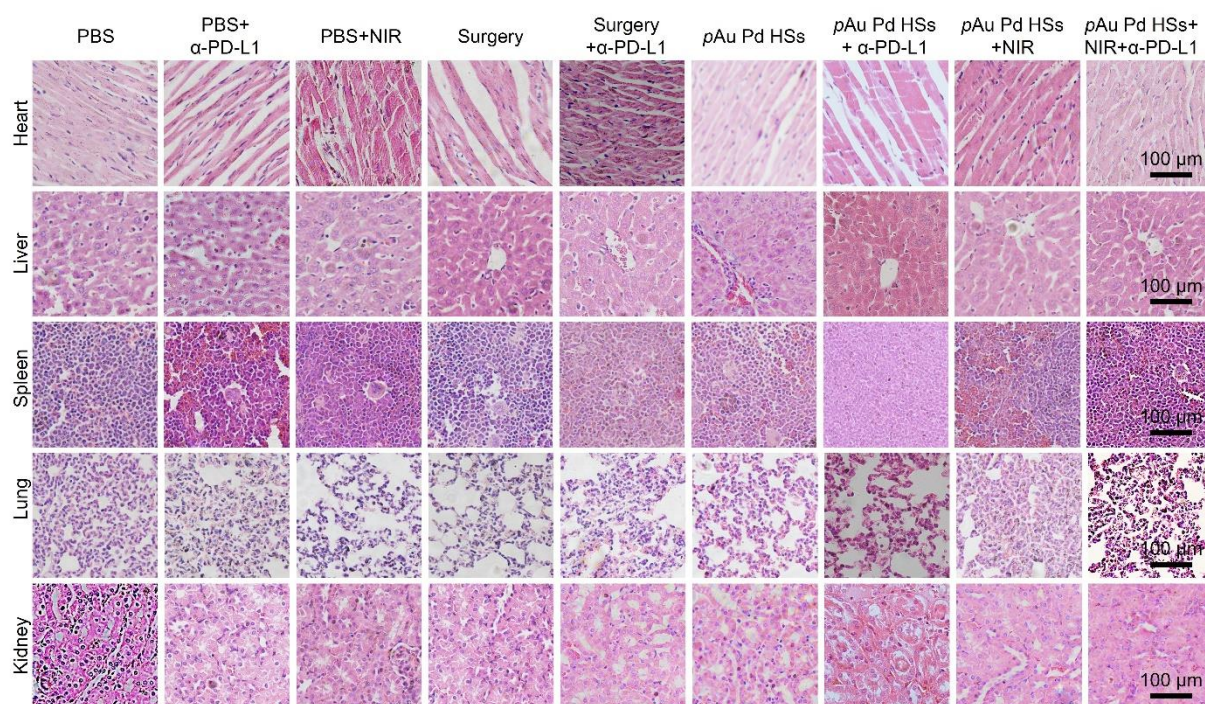

**Figure S11.** H&E staining histological images of heart, liver, spleen, lung, and kidney collected at the end of treatment.

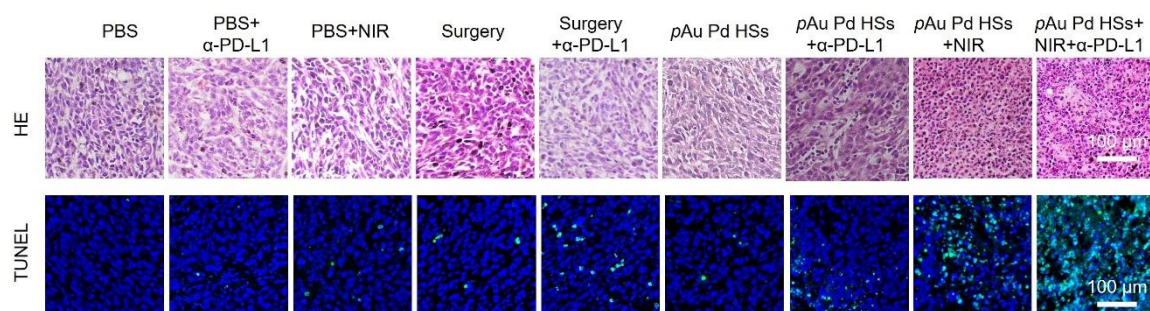

**Figure S12.** H&E and TUNEL staining for the left tumor tissues in each group.



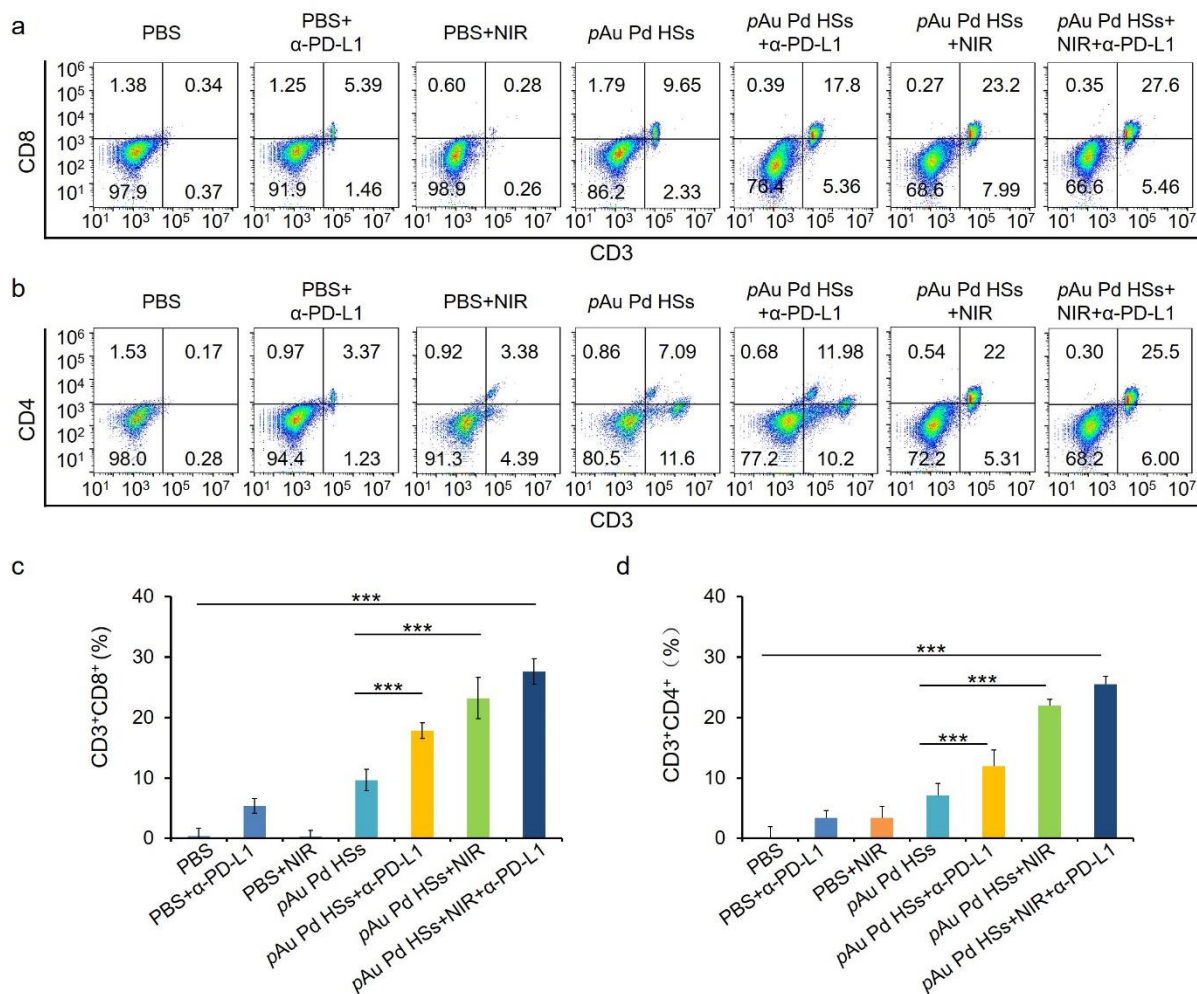

**Figure S13.** Typical flow cytometry plots of (a) CD8<sup>+</sup> T cells and (b) CD4<sup>+</sup> T cells in the primary tumors after different treatments. Percentages of CD8<sup>+</sup> (c) and CD4<sup>+</sup> (d) T cells with respect to the total tumor of cells.

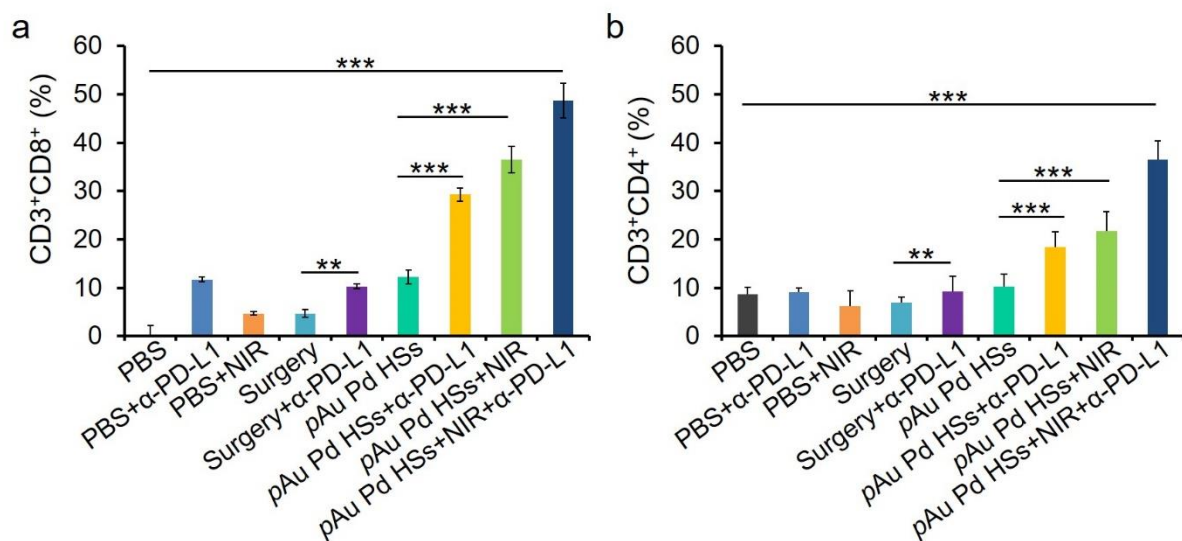

**Figure S14.** Percentages of CD8<sup>+</sup> (a) and CD4<sup>+</sup> (b) T cells with respect to the total tumor of cells.

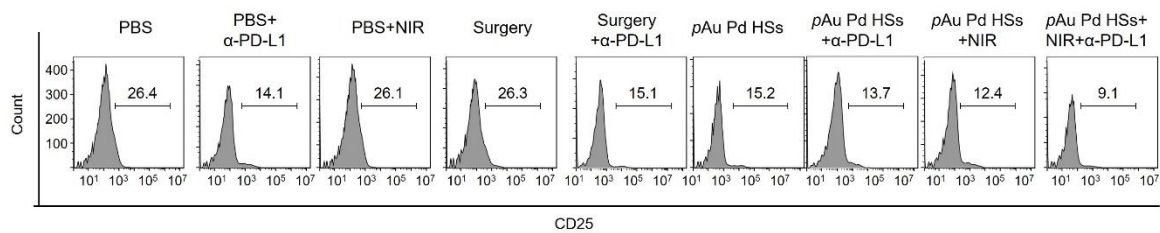

**Figure S15.** Flow cytometry analysis of Treg cells (CD25<sup>+</sup>) in the left tumor tissues at the 14th day (gated on CD3<sup>+</sup>CD4<sup>+</sup> cells).

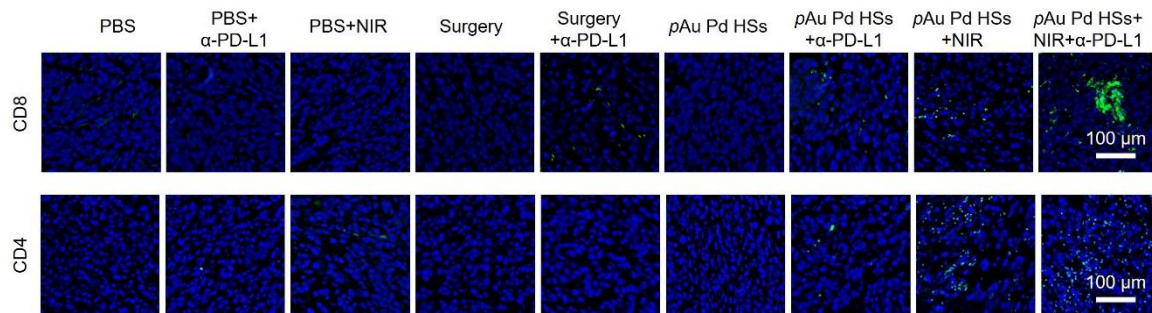

**Figure S16.** Immunofluorescence staining for CD8<sup>+</sup> T cells and CD4<sup>+</sup> T cells in left tumor tissues after various treatments indicated.
